# Supplementary material for: TBX5 R264K acts as a modifier to develop dilated cardiomyopathy in mice independently of T-box pathway
Source: PubMed Central journal article supplement (PMC7112173; doi:10.1371/journal.pone.0227393), 2020-04-01
Supplement: pone.0227393.s008.pdf [file pone.0227393.s008.pdf]

**S2 Table. Grading scale for reactive fibrosis and replacement fibrosis.**

---

**Grading scale for fibrosis**

---

Reactive Fibrosis

0=Negative

1=Perivascular

2=Perivascular with extension to interstitium

a. focal

b. diffuse

3=Encircling of individual myocytes

a. without perivascular fibrosis

b. with perivascular fibrosis

Replacement Fibrosis

0=Negative

1=Minimal foci

2=Occasional foci and small scars

3=Extensive scarring

---
