# Supplementary material for: TBX5 R264K acts as a modifier to develop dilated cardiomyopathy in mice independently of T-box pathway
Source: PubMed Central journal article supplement (PMC7112173; doi:10.1371/journal.pone.0227393), 2020-04-01
Supplement: pone.0227393.s009.pdf [file pone.0227393.s009.pdf]

**S3 Table. PCR primer sequences (5'to 3') used to real time RT-PCR.**

| Genes   | Sequences (forward primer) | Sequences (reverse primer) |
|---------|----------------------------|----------------------------|
| Gapdh   | acagtccatgccatcactgc       | taggaacacggaaggccatg       |
| Acta1   | gtcctgcaagtgaacaagcc       | caggatggagccaccgatc        |
| Gm7120  | agcgggatttttagcgtctgt      | gaaggaaaggtcttcgcgga       |
| Ankrd1  | tegactcttgatgaccttcgg      | ttgctttggttcactctgc        |
| Ankrd23 | ggcaccacaaagcaacgaaa       | ctgccagtctcgagccag         |
| Myot    | cagaatgctgctgctgtgtt       | acttgtgatgtgggaacgtg       |
| Srp54a  | cacagatggcaaaattaaaccaaca  | actgcccatcattgactga        |
| Srp54b  | gccaaaatgatggaccacg        | cctttcatggtgccagcagc       |
| Srp54c  | gccaaaatgatggaccacg        | cctttcatggtgccagcagc       |
| Tbx5    | cccacctaaccataccac         | acggcttcttataggggtgc       |
| Nppa    | tgggggtaggattgacagg        | cagaatcgactgcctttctc       |
| Myh7    | ctccatctctgacaacgect       | tagtgttgacagtcttcccagc     |
| Mybpc3  | ctgctcccactgtggtctg        | ccactcctcatcagcaccag       |
| Sln     | tggaggtggagagactgagg       | tccagaaggacttgtgattgca     |
| Actc1   | tgaagatcctcactgagcgc       | tcaaaatccagggcgacgta       |
| Myl7    | aagccatcctgagtgccttc       | gaacttgtctgctgggtca        |
