# Supplementary material for: TBX5 R264K acts as a modifier to develop dilated cardiomyopathy in mice independently of T-box pathway
Source: PubMed Central journal article supplement (PMC7112173; doi:10.1371/journal.pone.0227393), 2020-04-01
Supplement: pone.0227393.s010.pdf [file pone.0227393.s010.pdf]

**S4 Table. Variant identified in the patients**

| gene        | protein     | coding   | dbsnp       | FATHMM                       | SIFT                 | Polyphen-2                           | Align<br>GVGD | Mutation<br>Taster | Provean                       | CADD | Minor allele frequency |                           |        |
|-------------|-------------|----------|-------------|------------------------------|----------------------|--------------------------------------|---------------|--------------------|-------------------------------|------|------------------------|---------------------------|--------|
|             |             |          |             |                              |                      |                                      |               |                    |                               |      | gnomAD                 | gnomAD<br>(East<br>Asian) | HGVD   |
| <i>TBX5</i> | p.Arg264Lys | c.791G>A | rs201071418 | Damaging<br>score; -<br>1.57 | Damaging<br>score; 0 | Probably<br>damaging<br>score; 0.991 | C25           | Disease<br>causing | Tolerated<br>score:<br>-0.533 | 26.7 | 0.0001168              | 0.001654                  | 0.0075 |
