# Supplementary material for: TBX5 R264K acts as a modifier to develop dilated cardiomyopathy in mice independently of T-box pathway
Source: PubMed Central journal article supplement (PMC7112173; doi:10.1371/journal.pone.0227393), 2020-04-01
Supplement: pone.0227393.s011.pdf [file pone.0227393.s011.pdf]

**S5 Table. *In silico* predictive algorithms used in the study [3].**

| Category                                | Basis                                                                                             | Name            | Website                                                                                 | Prediction Threshold                                             |
|-----------------------------------------|---------------------------------------------------------------------------------------------------|-----------------|-----------------------------------------------------------------------------------------|------------------------------------------------------------------|
| Missense prediction                     | Evolutionary conservation                                                                         | FATHMM          | <a href="http://fathmm.biocompute.org.uk">http://fathmm.biocompute.org.uk</a>           | <-1.5 Damaging<br>>-1.5 Tolerated                                |
|                                         |                                                                                                   | SIFT            | <a href="http://sift.jcvi.org">http://sift.jcvi.org</a>                                 | <0.05 Deleterious<br>>0.05 Tolerated                             |
| Missense prediction                     | Protein structure/function and evolutionary conservation                                          | Align GVGD      | <a href="http://agvgd.iarc.fr/agvgd_input.php">http://agvgd.iarc.fr/agvgd_input.php</a> | $\geq$ C15 Probably Damaging                                     |
|                                         |                                                                                                   | Mutation Taster | <a href="http://www.mutationtaster.org">http://www.mutationtaster.org</a>               | Disease causing                                                  |
|                                         |                                                                                                   | Polyphen-2      | <a href="http://genetics.bwh.harvard.edu/pph2">http://genetics.bwh.harvard.edu/pph2</a> | 0.85 to 1 Probably Damage<br>0.15 to 0.85 Possibly Damage        |
| Missense insertion/deletions prediction | and Alignment and measurement of similarity between variant sequence and protein sequence homolog | PROVEAN         | <a href="http://provean.jcvi.org/index.php">http://provean.jcvi.org/index.php</a>       | <-2.5 Deleterious<br>>-2.5 Neutral                               |
| Missense insertion/deletions prediction | and Contrasts annotations of fixed/nearly fixed derived alleles in humans with simulated variants | CADD            | <a href="http://cadd.gs.washington.edu">http://cadd.gs.washington.edu</a>               | $\geq$ 20 1% most deleterious<br>$\geq$ 30 0.1% most deleterious |

**Supporting Reference**

3. Richards S, Aziz N, Bale S, Bick D, Das S, Gastier-Foster J, Grody WW, Hegde M, Lyon E, Spector E, Voelkerding K, Rehm HL. Standards and guidelines for the interpretation of sequence variants: a joint consensus recommendation of the American College of Medical Genetics and Genomics and the association for molecular autopsy. *Genet Med.* 2015; 17: 405–423.
