# Supplementary material for: TBX5 R264K acts as a modifier to develop dilated cardiomyopathy in mice independently of T-box pathway
Source: PubMed Central journal article supplement (PMC7112173; doi:10.1371/journal.pone.0227393), 2020-04-01
Supplement: pone.0227393.s012.pdf [file pone.0227393.s012.pdf]

**S6 Table. Characteristics and echocardiographic data in wild-type and *Tbx5*<sup>R264K/R264K</sup> mice in mature to middle age. *P* value \*<0.05.**

|                   | Mature to middle age<br>wild-type<br>(n=7) | Mature to middle age<br><i>Tbx5</i> <sup>R264K/R264K</sup><br>(n=6) |
|-------------------|--------------------------------------------|---------------------------------------------------------------------|
| male              | 3                                          | 3                                                                   |
| BW (g)            | 33.5±5.7                                   | 33.6±5.1                                                            |
| HR (/min)         | 432.8±29.3                                 | 435.3±18.8                                                          |
| LVDd (mm)         | 4.21±0.42                                  | 4.57±0.41                                                           |
| LVDs (mm)         | 2.87±0.29                                  | 3.38±0.44*                                                          |
| AWD (mm)          | 0.83±0.16                                  | 0.73±0.1                                                            |
| PWD (mm)          | 0.9±0.22                                   | 0.7±0.09                                                            |
| FS (%)            | 31.8±2.6                                   | 26.1±4.0*                                                           |
| E (cm/s)          | 63.3±16.4                                  | 50.7±15.8                                                           |
| A (cm/s)          | 42.7±11.2                                  | 31.6±15                                                             |
| heart weight (mg) | 155.3±17.4                                 | 161.2±9.3                                                           |
| HW/BW             | 4.69±0.57                                  | 4.89±0.87                                                           |
