# Supplementary material for: TBX5 R264K acts as a modifier to develop dilated cardiomyopathy in mice independently of T-box pathway
Source: PubMed Central journal article supplement (PMC7112173; doi:10.1371/journal.pone.0227393), 2020-04-01
Supplement: pone.0227393.s013.pdf [file pone.0227393.s013.pdf]

S7 Table. Electrocardiogram data comparing *Tbx<sup>g2284K/+</sup>* and wild type mice

|                      | RR Interval (s) | Heart Rate (BPM) | PR Interval (s) | P Duration (s) | QRS Interval (s) | QT Interval (s) | QTc (s) | JT Interval (s) | Tpeak-Tend Interval (s) | P Amplitude (mV) | Q Amplitude (mV) | R Amplitude (mV) | S Amplitude (mV) | ST Height (mV) | T Amplitude (mV) |         |
|----------------------|-----------------|------------------|-----------------|----------------|------------------|-----------------|---------|-----------------|-------------------------|------------------|------------------|------------------|------------------|----------------|------------------|---------|
| <b>Hetero-Male</b>   | 39-8-10         | 0.0994           | 603.5700        | 0.0368         | 0.0081           | 0.0176          | 0.0424  | 0.1346          | 0.0248                  | 0.0225           | 0.1092           | 0.5026           | -0.6665          | 0.0356         | 0.0401           |         |
|                      | 39-8-11         | 0.1464           | 409.8100        | 0.0379         | 0.0084           | 0.0171          | 0.0416  | 0.1087          | 0.0245                  | 0.0174           | 0.0504           | -0.0357          | 0.7263           | -0.7097        | -0.0156          | -0.0377 |
|                      | 39-8-13         | 0.1173           | 511.3900        | 0.0364         | 0.0067           | 0.0105          | 0.0356  | 0.1040          | 0.0251                  | 0.0215           | 0.0558           | -0.0029          | 0.6569           | -0.4462        | -0.0217          | -0.0215 |
|                      | 39-8-15         | 0.1313           | 456.8400        | 0.0412         | 0.0101           | 0.0177          | 0.0426  | 0.1175          | 0.0248                  | 0.0151           | 0.0445           | -0.0218          | 0.3369           | -0.3736        | -0.0019          | -0.0228 |
|                      | 39-8-19         | 0.1298           | 462.1600        | 0.0373         | 0.0089           | 0.0167          | 0.0439  | 0.1219          | 0.0272                  | 0.0191           | 0.1038           | -0.1948          | 1.9601           | -0.8218        | -0.0376          | -0.0567 |
| <b>Hetero-Female</b> | 39-8-16         | 0.1285           | 466.9200        | 0.0392         | 0.0081           | 0.0170          | 0.0401  | 0.1119          | 0.0231                  | 0.0154           | 0.0743           | -0.1051          | 1.1012           | -0.8270        | -0.0126          | -0.0525 |
|                      | 39-8-17         | 0.1423           | 421.6200        | 0.0470         | 0.0100           | 0.0153          | 0.0407  | 0.1080          | 0.0254                  | 0.0118           | 0.0684           | -0.0118          | 0.3979           | -0.3910        | 0.0088           | -0.0474 |
|                      | 39-8-18         | 0.1359           | 441.5800        | 0.0419         | 0.0086           | 0.0153          | 0.0510  | 0.1384          | 0.0357                  | 0.0291           | 0.0708           | -0.0719          | 1.4835           | -0.5222        | -0.0703          | -0.0946 |
|                      | 39-8-30         | 0.1346           | 445.6900        | 0.0400         | 0.0079           | 0.0106          | 0.0412  | 0.1124          | 0.0306                  | 0.0197           | 0.1052           | 0.0067           | 0.9389           | -0.4926        | -0.0180          | -0.0711 |
|                      | 39-8-31         | 0.1247           | 481.3700        | 0.0391         | 0.0103           | 0.0172          | 0.0411  | 0.1165          | 0.0240                  | 0.0164           | 0.0817           | -0.1109          | 0.9310           | -0.4990        | -0.0317          | -0.0477 |
| <b>WT-Male</b>       | 39-8-20         | 0.1554           | 386.3300        | 0.0376         | 0.0073           | 0.0137          | 0.0438  | 0.1113          | 0.0301                  | 0.0212           | 0.0515           | 0.0049           | 0.5444           | -0.3036        | -0.0573          | -0.0359 |
|                      | 39-8-21         | 0.1373           | 437.0000        | 0.0369         | 0.0113           | 0.0105          | 0.0502  | 0.1355          | 0.0398                  | 0.0260           | 0.0974           | -0.0068          | 0.6604           | -0.1843        | 0.0912           | -0.0633 |
|                      | 39-8-22         | 0.1684           | 356.3900        | 0.0397         | 0.0105           | 0.0167          | 0.0516  | 0.1258          | 0.0349                  | 0.0293           | 0.0708           | -0.0531          | 1.4498           | -0.5332        | -0.0952          | -0.1212 |
|                      | 39-8-28         | 0.1108           | 541.7200        | 0.0339         | 0.0036           | 0.0178          | 0.0292  | 0.0877          | 0.0114                  | 0.0083           | 0.0676           | -0.3589          | 0.6416           | -0.3882        | 0.0469           | 0.0469  |
|                      | 39-8-29         | 0.1394           | 430.3200        | 0.0425         | 0.0071           | 0.0186          | 0.0390  | 0.1043          | 0.0204                  | 0.0172           | 0.0697           | 0.0026           | 0.6829           | -0.4224        | -0.0397          | -0.0447 |
| <b>WT-Female</b>     | 39-8-32         | 0.1459           | 411.1400        | 0.0395         | 0.0075           | 0.0185          | 0.0407  | 0.1066          | 0.0222                  | 0.0160           | 0.0655           | -0.1207          | 0.9207           | -0.5266        | -0.0224          | -0.0472 |
|                      | 39-8-33         | 0.1454           | 412.6900        | 0.0428         | 0.0104           | 0.0155          | 0.0495  | 0.1298          | 0.0340                  | 0.0267           | 0.0586           | -0.0755          | 0.9019           | -0.4348        | -0.0272          | -0.0603 |
|                      | 39-8-34         | 0.1269           | 472.9700        | 0.0402         | 0.0078           | 0.0175          | 0.0426  | 0.1195          | 0.0251                  | 0.0179           | 0.0596           | -0.0719          | 0.5628           | -0.2304        | -0.0145          | -0.0289 |
|                      | 39-8-35         | 0.1382           | 434.0400        | 0.0413         | 0.0074           | 0.0167          | 0.0421  | 0.1134          | 0.0254                  | 0.0180           | 0.0798           | -0.0586          | 0.8116           | -0.4834        | -0.0246          | -0.0538 |
|                      | 39-8-36         | 0.1400           | 428.5600        | 0.0372         | 0.0100           | 0.0174          | 0.0439  | 0.1175          | 0.0265                  | 0.0202           | 0.0569           | -0.1689          | 1.1684           | -0.3903        | -0.0502          | -0.0664 |

|                        | RR Interval (s) | Heart Rate (BPM) | PR Interval (s) | P Duration (s) | QRS Interval (s) | QT Interval (s) | QTc (s) | JT Interval (s) | Tpeak-Tend Interval (s) | P Amplitude (mV) | Q Amplitude (mV) | R Amplitude (mV) | S Amplitude (mV) | ST Height (mV) | T Amplitude (mV) |
|------------------------|-----------------|------------------|-----------------|----------------|------------------|-----------------|---------|-----------------|-------------------------|------------------|------------------|------------------|------------------|----------------|------------------|
| <b>Hetero-Male</b>     | 0.1249          | 488.7540         | 0.0379          | 0.0084         | 0.0159           | 0.0412          | 0.1173  | 0.0253          | 0.0191                  | 0.0727           | -0.1594          | 0.8366           | -0.6036          | -0.0083        | -0.0197          |
| <b>WT-Male</b>         | 0.1422          | 430.3520         | 0.0381          | 0.0080         | 0.0154           | 0.0428          | 0.1129  | 0.0273          | 0.0204                  | 0.0714           | -0.0823          | 0.7958           | -0.3663          | -0.0108        | -0.0436          |
| <b>Hetero-Female</b>   | 0.1332          | 451.4360         | 0.0415          | 0.0090         | 0.0151           | 0.0428          | 0.1174  | 0.0278          | 0.0185                  | 0.0801           | -0.0586          | 0.9705           | -0.5464          | -0.0248        | -0.0627          |
| <b>WT-Female</b>       | 0.1393          | 431.8800         | 0.0402          | 0.0086         | 0.0171           | 0.0438          | 0.1173  | 0.0267          | 0.0198                  | 0.0641           | -0.0991          | 0.8731           | -0.4131          | -0.0278        | -0.0513          |
| <b>WT</b>              | 0.1408          | 431.1160         | 0.0392          | 0.0083         | 0.0163           | 0.0433          | 0.1151  | 0.0270          | 0.0201                  | 0.0677           | -0.0907          | 0.8345           | -0.3897          | -0.0193        | -0.0475          |
| <b>mut</b>             | 0.1290          | 470.0950         | 0.0397          | 0.0087         | 0.0155           | 0.0420          | 0.1174  | 0.0265          | 0.0188                  | 0.0764           | -0.1090          | 0.9035           | -0.5750          | -0.0165        | -0.0412          |
| <b>P value of Test</b> | 0.085           | 0.114            | 0.692           | 0.606          | 0.510            | 0.613           | 0.696   | 0.878           | 0.607                   | 0.320            | 0.773            | 0.713            | 0.011            | 0.884          | 0.722            |
