# Supplementary material for: TBX5 R264K acts as a modifier to develop dilated cardiomyopathy in mice independently of T-box pathway
Source: PubMed Central journal article supplement (PMC7112173; doi:10.1371/journal.pone.0227393), 2020-04-01
Supplement: pone.0227393.s014.pdf [file pone.0227393.s014.pdf]

**S8 Table. Terms about biological processes inferred by g:Profiler**

| source | term name                                                   | term_id    | adjusted_p_value | negative_log10_of_adjusted_p_value | term_size | query_size | intersection_size | effective_domain_size | intersections            |
|--------|-------------------------------------------------------------|------------|------------------|------------------------------------|-----------|------------|-------------------|-----------------------|--------------------------|
| GO:BP  | response to muscle stretch                                  | GO:0035994 | 0.015927463      | 1.797853406                        | 19        | 7          | 2                 | 21207                 | ANKRD1,ANKRD23           |
| GO:BP  | SRP-dependent cotranslational protein targeting to membrane | GO:0006614 | 0.015927463      | 1.797853406                        | 19        | 7          | 2                 | 21207                 | SRP54C,SRP54A            |
| GO:BP  | cotranslational protein targeting to membrane               | GO:0006613 | 0.017694398      | 1.752164208                        | 20        | 7          | 2                 | 21207                 | SRP54C,SRP54A            |
| GO:BP  | response to mechanical stimulus                             | GO:0009612 | 0.038920733      | 1.409818993                        | 223       | 7          | 3                 | 21207                 | ANKRD1,<br>ANKRD23,ACTA1 |
